# Supplementary material
Source: HighWire-hosted journal article supplement (https://hw-f5-jim.highwire.org/content/69/1/91)

**Supplementary Figure 1. A flowchart for patient selection**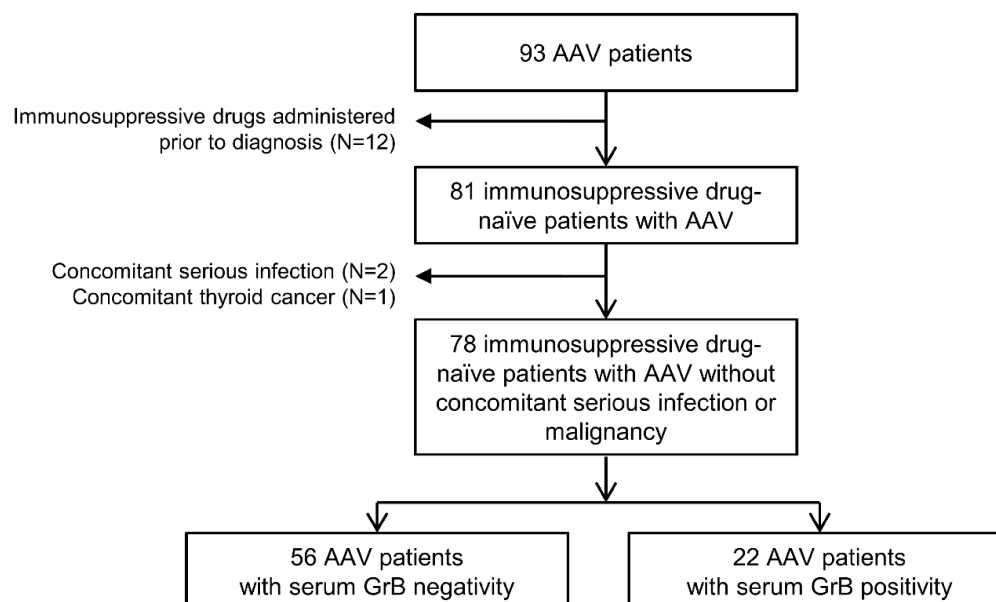

GrB: granzyme B.

Supplement: inline-supplementary-material-1 [file inline-supplementary-material-1.pdf]
